# Supplementary material for: Improved Medicago sativa Nodulation under Stress Assisted by Variovorax sp. Endophytes
Source: MDPI journal article supplement (doi:10.3390/plants11081091), 2022-04-17
Supplement: s1 [file s1]

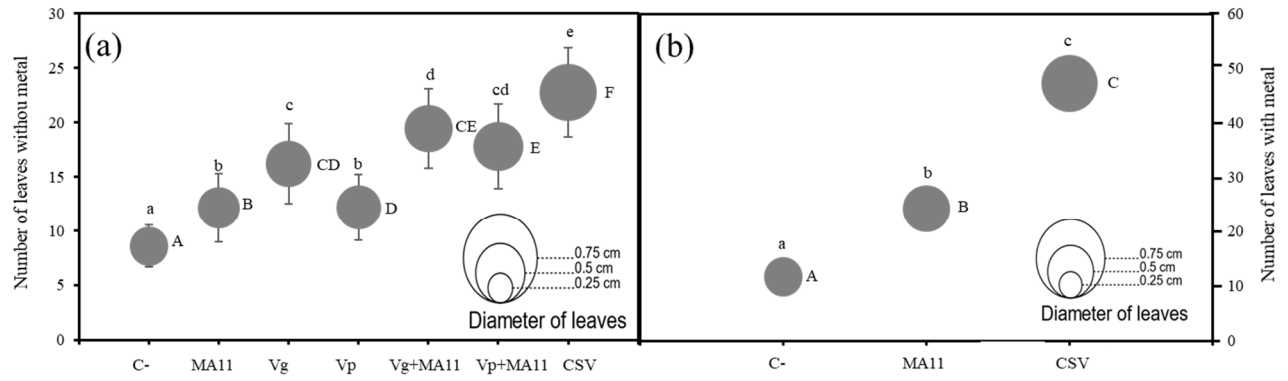

**Figure S1. Number and size of *Medicago sativa* leaves in pot experiments.** (a) Pots with nutrient-poor soil as a substrate and (b) pots with soils polluted with metal as a substrate after 60 days under greenhouse conditions. Values are means  $\pm$  S.D. ( $n = 16$ ). The size of a circle indicates the mean of the diameter of the leaves. Different letters indicate means that are significantly different from each other (one-way ANOVA; LSD test,  $p < 0.0001$ ). C-: non inoculation; MA11: inoculation with *E. medicae* MA11; Vg: inoculation with *V. gossypii* JM-310<sup>T</sup>; Vp: inoculation with *V. paradoxus* S110<sup>T</sup>; Vg+MA11: co-inoculation with *V. gossypii* JM-310<sup>T</sup> and *E. medicae* MA11; Vp+MA11: co-inoculation with *V. paradoxus* S110<sup>T</sup> and *E. medicae* MA11; CSV: co-inoculation with *V. gossypii* JM-310<sup>T</sup>, *V. paradoxus* S110<sup>T</sup>, and *E. medicae* MA11.
